# Supplementary material for: Natural Grass Cultivation Management Improves Apple Fruit Quality by Regulating Soil Mineral Nitrogen Content and Carbon–Nitrogen Metabolism
Source: MDPI journal article supplement (doi:10.3390/metabo13080925), 2023-08-08
Supplement: s1 [file s1]

**Table S1** Primers used for qRT-PCR.

| Gene name      | Primer-Forward                   | Primer-Reverse                    |
|----------------|----------------------------------|-----------------------------------|
| <i>MdSOT1</i>  | 5'- GACAGAACCTCAGACTCCAAAG -3'   | 5'- TGACCAGAGACCTGAACGATA -3'     |
| <i>MdSOT2</i>  | 5'- CGTATCCAACCTATGCCTTCTCC -3'  | 5'- GACACCGACGGCAAGAATAA -3'      |
| <i>MdSOT3</i>  | 5'- GCCGGTACTCTAAACATCTACTC -3'  | 5'- GAAGATGACTCCCGCAAGAA -3'      |
| <i>MdSUT1</i>  | 5'- GTGGTAATTIACCGGCATTTGTCG -3' | 5'- AAGCTAGAGGCCGCTAGGGCAAG -3'   |
| <i>MdSUT2</i>  | 5'- CAGATGGTTTCCTTTCTTGTTGAG -3' | 5'- TGCTGATACATAGTGAGTGGAACCT -3' |
| <i>MdSUT4</i>  | 5'- TGATTACCTCCAGTTGGCATTG -3'   | 5'- GCCAAGTCCCAAAGACTCAATTC -3'   |
| <i>β-actin</i> | 5'- TGGTGTCATGGTTGGTATGG -3'     | 5'- CCGTGCTCAATGGGATACTT -3'      |
